# Supplementary material for: Cadmium oxide/alkali metal halide mixtures – a potential high capacity sorbent for pre-combustion CO2 capture
Source: Royal Society of Chemistry journal article supplement (doi:10.1039/c3ta12087b), 2013-01-01
Supplement: c3ta12087b.pdf [file c3ta12087b.pdf]

## SUPPLEMENTARY MATERIAL

### Cadmium oxide/alkali metal halide mixtures - a potential high capacity sorbent for pre-combustion CO<sub>2</sub> capture

Christian Vogt<sup>#</sup>, Gregory P Knowles<sup>#</sup>, Shery LY Chang<sup>+</sup> and Alan L Chaffee<sup>#\*</sup>

<sup>#</sup> Cooperative Research Centre for Greenhouse Gas Technologies (CO2CRC), School of Chemistry, Box 23, Monash University, Clayton VIC 3800

<sup>+</sup> Monash Centre for Electron Microscopy, Monash University, Clayton VIC 3800

<sup>+</sup> Current Address: Ernst Ruska-Centrum, Forschungszentrum Jülich GmbH, 52425 Jülich, Germany

\* corresponding author: [alan.chaffee@monash.edu](mailto:alan.chaffee@monash.edu)

Phone:+61 3 990-54626, Fax:+61 3 990-54597

## 1 Nitrogen adsorption isotherm and pore size distribution

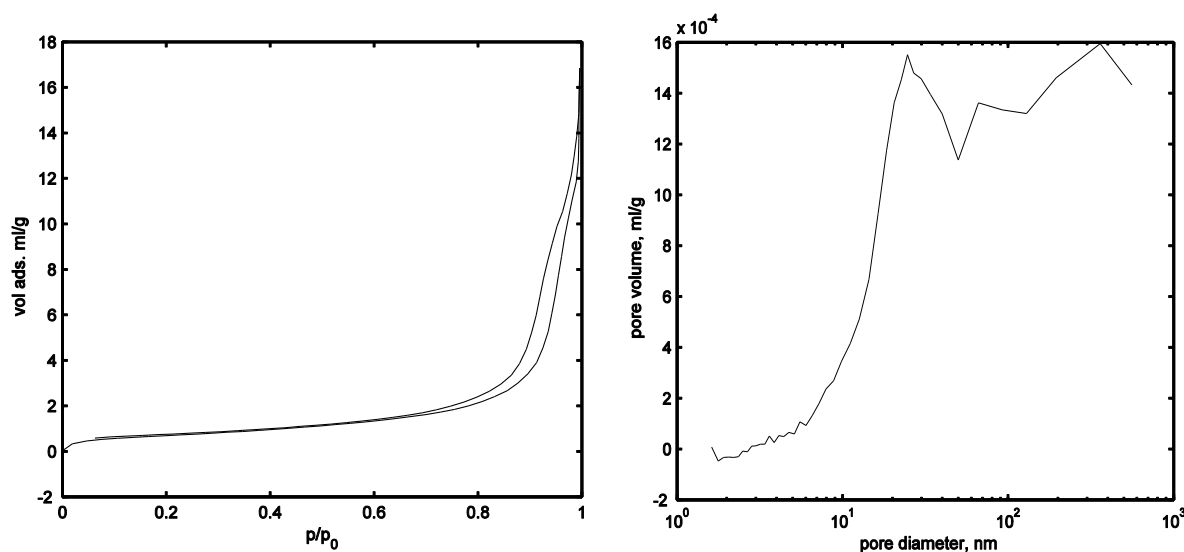

Figure A: a. N<sub>2</sub> adsorption-desorption isotherm (gas volume at STP adsorbed vs.  $p/p_0$ ), b. BJH pore volume of a 17.5 % NaI sample, after initial calcination at 500 °C in air 3 h

## 2 Le Bail fit of the XRD data

### 2.1 Statistics

The statistical values of the Le Bail fits performed in the paper are given in Table A.

Table A: Statistics of the Le Bail fits

| sample | reference in supplement | $wRp$ | $Rp$ | $\chi^2$ |
|--------|-------------------------|-------|------|----------|
|--------|-------------------------|-------|------|----------|

|                                    |          |        |        |       |
|------------------------------------|----------|--------|--------|-------|
| 17.5 % NaI,<br>calcined 500 °C air | Figure B | 0.1663 | 0.1109 | 5.891 |
| pure CdO                           | Figure C | 0.1145 | 0.0740 | 2.930 |
| pure CdCO <sub>3</sub>             | Figure D | 0.1245 | 0.0875 | 1.529 |

## 2.2 Le Bail fit graphs

The graphs of the Le Bail refinements of the powder XRD data are given in the figures below. The black crosses denote the observed, the red line the refined data. The background is plotted green; blue denotes the difference between calculated and observed. The difference graph is offset below the other graphs.

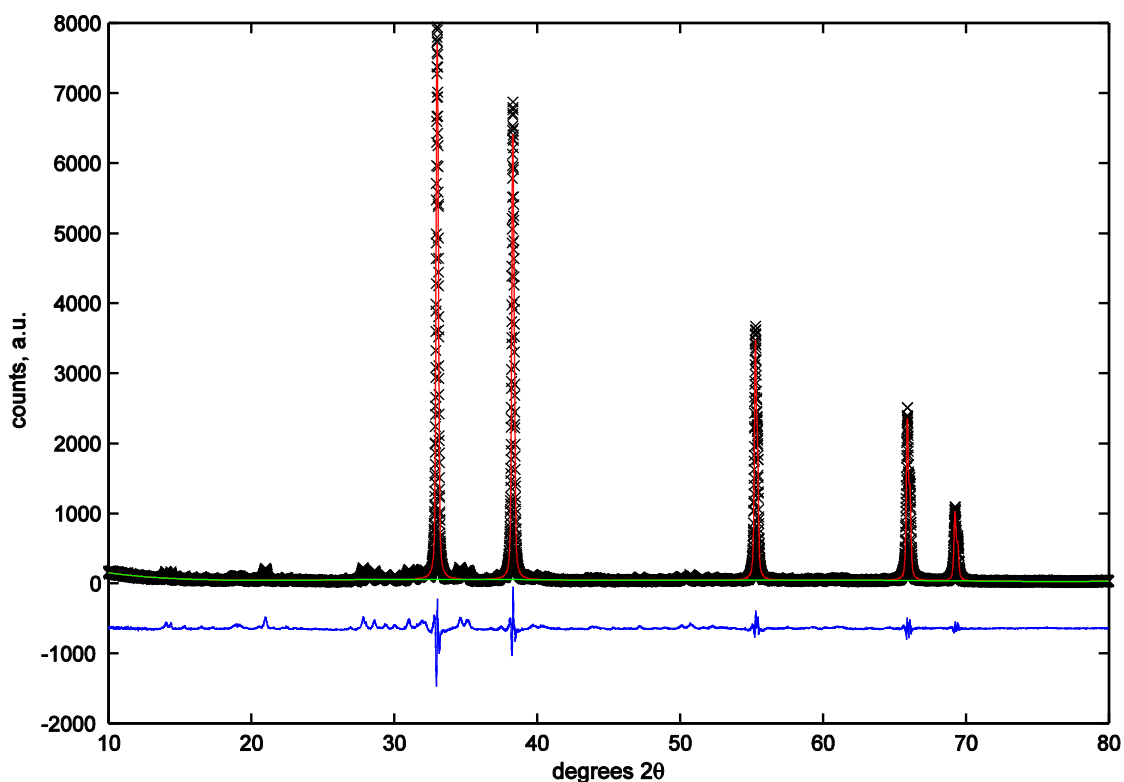

Figure B: Le Bail refinement plot of 17.5 % NaI sample, as synthesised

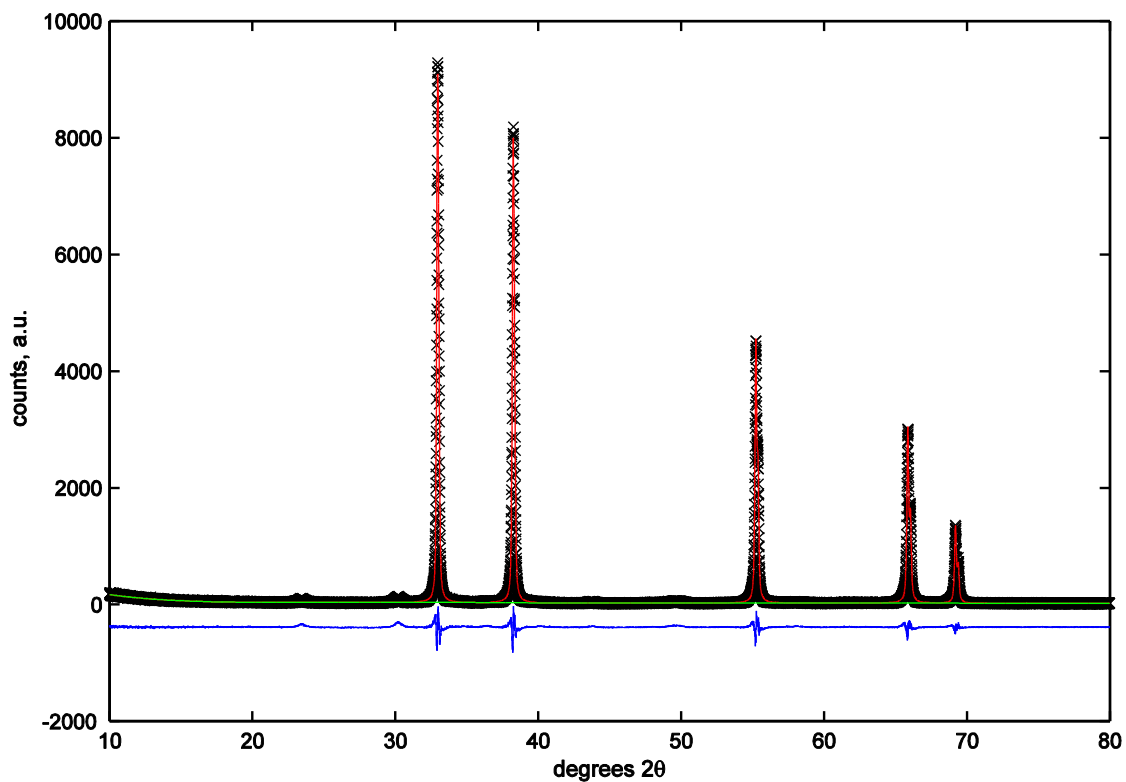

Figure C: Le Bail refinement plot of pure CdO

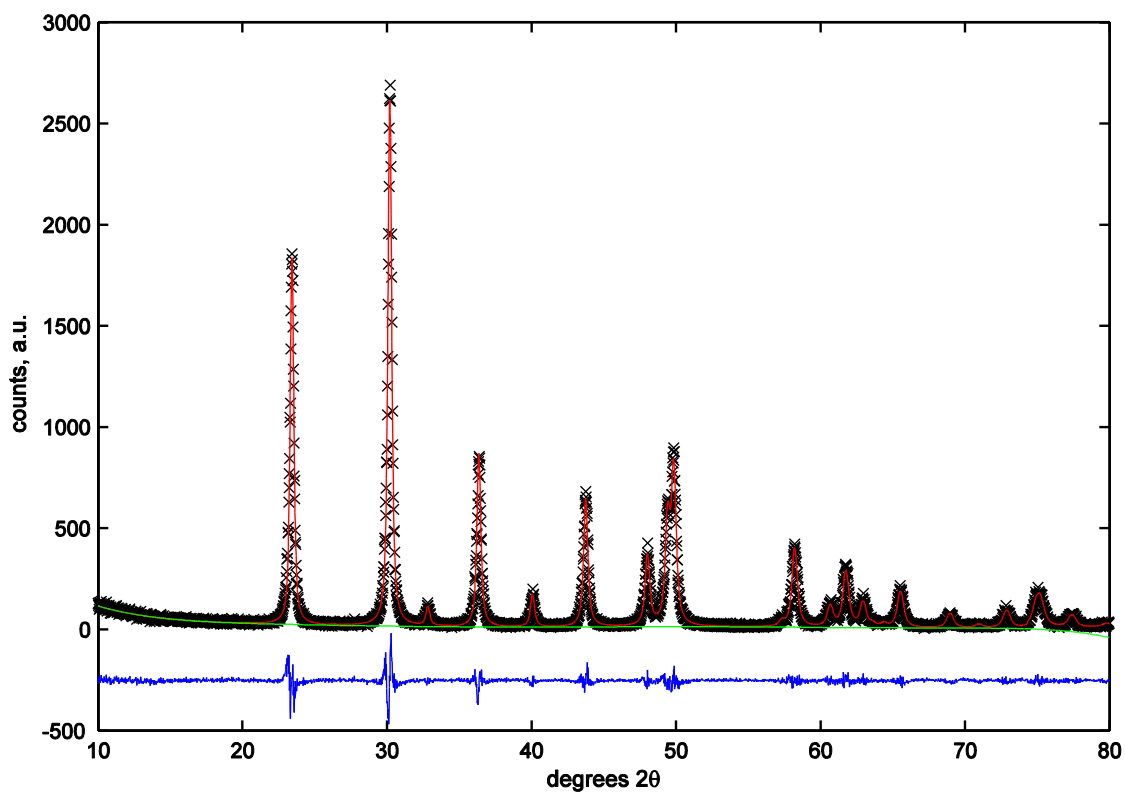

Figure D: Le Bail refinement plot of pure CdCO<sub>3</sub>

## 2.3 Results

Table B: Results of the Le Bail refinement of the laboratory XRD data for cadmium oxide and carbonate

| sample                                | phase             | unit cell lengths a = b | unit cell length c | space group |
|---------------------------------------|-------------------|-------------------------|--------------------|-------------|
| 17.5 % NaI calcined<br>500 °C air 3 h | CdO               | 4.6994 Å                | = a                | Fm-3m       |
| pure CdO                              | CdO               | 4.6949 Å                | = a                | Fm-3m       |
| PDF 4+ 2011 entry<br>04-001-3770      | CdO               | 4.6951 Å                | = a                | Fm-3m       |
| pure CdCO <sub>3</sub>                | CdCO <sub>3</sub> | 4.9330 Å                | 16.3448 Å          | R-3c        |
| PDF 4+ 2011 entry<br>04-014-4823      | CdCO <sub>3</sub> | 4.9207 Å                | 16.2968 Å          | R-3c        |

### 3 EDX results and Powder Diffraction File data

EDX results are given in Figure E to Figure G. The increased iodine content relative to cadmium is evident in Figure F. Table B shows the d-spacings and reciprocal distances for cadmium oxide, Powder Diffraction File entry 04-001-3770.

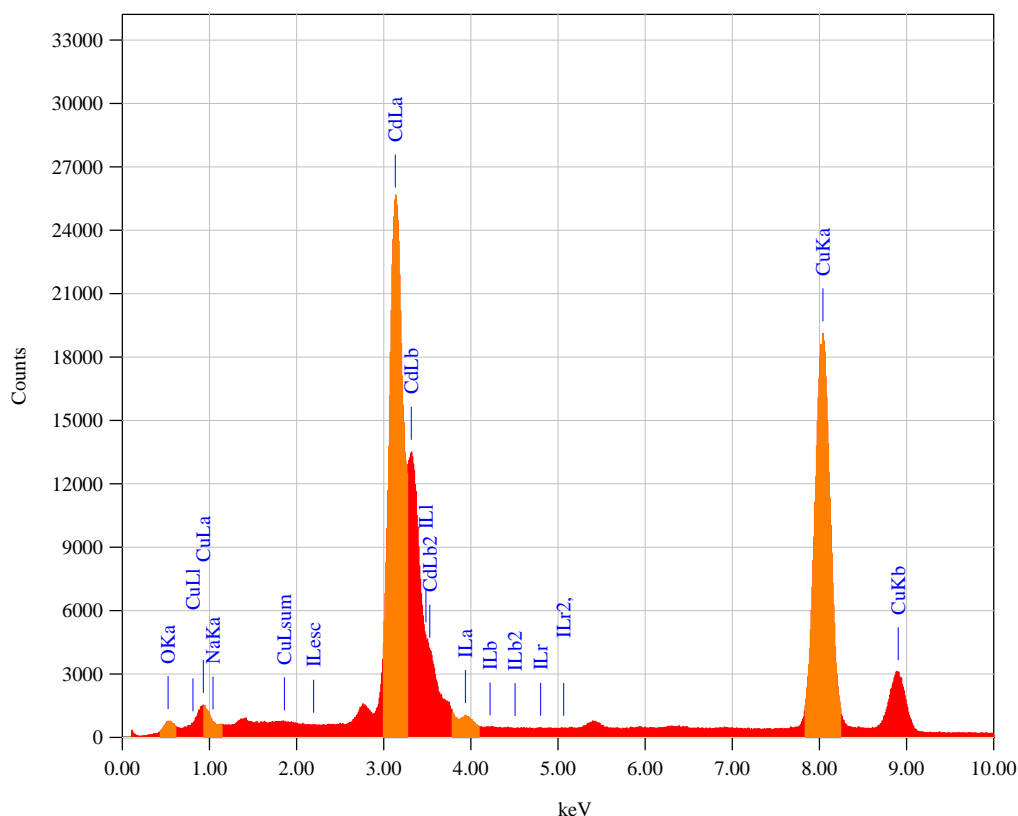

Figure E: EDX spectrum for 'edx 2' label in article.

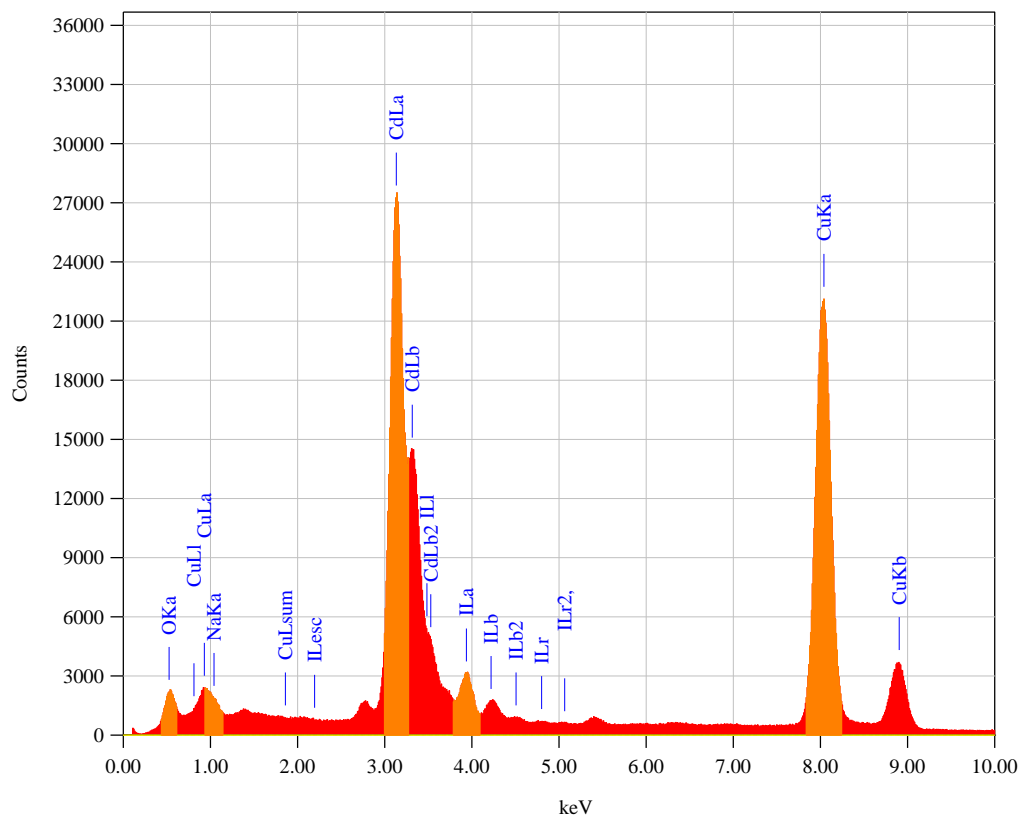

Figure F: EDX spectrum for 'edx 3' label in article.

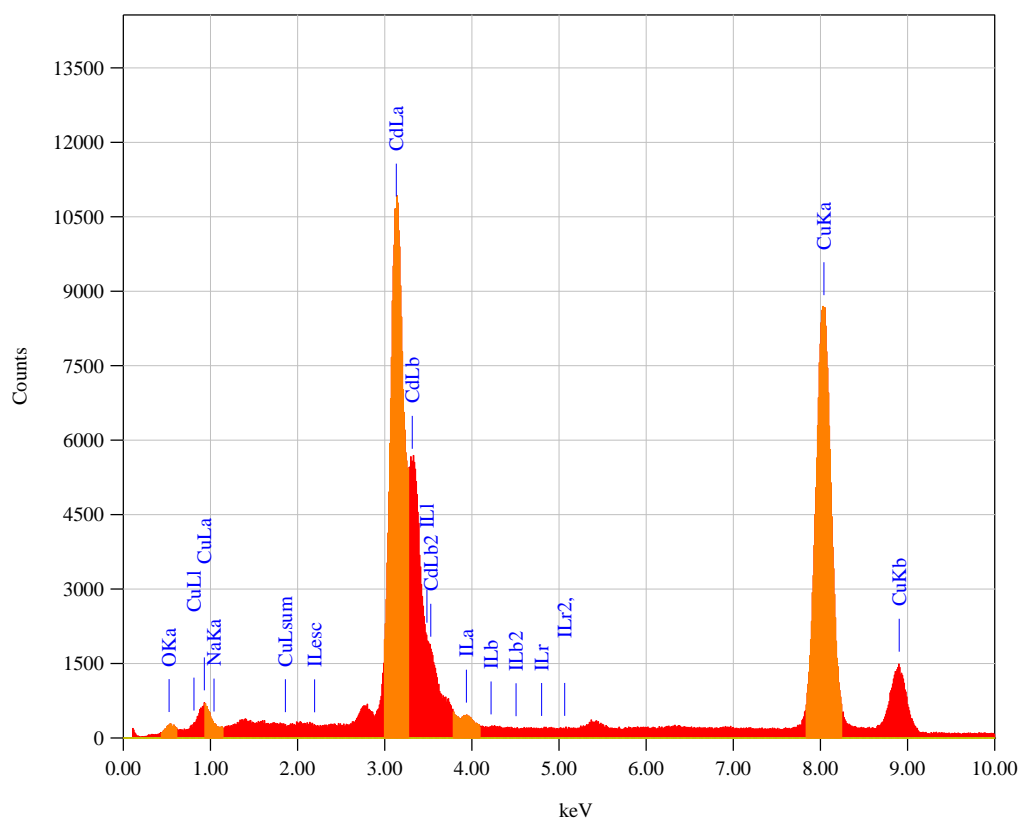

Figure G: EDX spectrum for 'edx 4' label in article.

Table B: Assignment of electron diffraction pattern observations corresponding to label A-K in the article, d-spacing values obtained from Powder Diffraction File entry 04-001-3770 (CdO)

| Label                            | A    | B    | C    | D    | E    | F    | G    | H    | I     | J     | K     |
|----------------------------------|------|------|------|------|------|------|------|------|-------|-------|-------|
| d-spacing<br>(Å)                 | 2.71 | 2.35 | 1.66 | 1.42 | 1.36 | 1.17 | 1.08 | 1.05 | 0.96  | 0.9   | 0.83  |
| Reciprocal<br>distance<br>(1/nm) | 3.69 | 4.26 | 6.02 | 7.06 | 7.38 | 8.52 | 9.28 | 9.53 | 10.43 | 11.07 | 12.05 |
| $Q$ (1/Å)                        | 2.32 | 2.68 | 3.78 | 4.44 | 4.64 | 5.35 | 5.83 | 5.99 | 6.55  | 6.96  | 7.57  |
| h                                | 1    | 2    | 2    | 3    | 2    | 4    | 3    | 4    | 4     | 5     | 4     |
| k                                | 1    | 0    | 2    | 1    | 2    | 0    | 3    | 2    | 2     | 1     | 4     |
| l                                | 1    | 0    | 0    | 1    | 2    | 0    | 1    | 0    | 2     | 1     | 0     |
